CORRECTION

# Correction: Effective Therapeutic Approach for Head and Neck Cancer by an Engineered Minibody Targeting the EGFR Receptor

The *PLOS ONE* Staff

The fourth author's name is spelled incorrectly. The correct name is: Won-Jae Chi. The correct citation is: Kim YP, Park D, Kim JJ, Chi W-J, Lee SH, et al. (2014) Effective Therapeutic Approach for Head and Neck Cancer by an Engineered Minibody Targeting the EGFR Receptor. PLoS ONE 9(12): e113442. doi:[10.1371/journal.pone.0113442](https://doi.org/10.1371/journal.pone.0113442)

## Reference

1. Kim YP, Park D, Kim JJ, Choi W-J, Lee SH, et al. (2014) Effective Therapeutic Approach for Head and Neck Cancer by an Engineered Minibody Targeting the EGFR Receptor. PLoS ONE 9(12): e113442. doi: [10.1371/journal.pone.0113442](https://doi.org/10.1371/journal.pone.0113442) PMID: [25438047](https://pubmed.ncbi.nlm.nih.gov/25438047/)

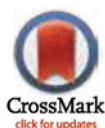

## OPEN ACCESS

**Citation:** The *PLOS ONE* Staff (2015) Correction: Effective Therapeutic Approach for Head and Neck Cancer by an Engineered Minibody Targeting the EGFR Receptor. PLoS ONE 10(1): e0117895. doi:[10.1371/journal.pone.0117895](https://doi.org/10.1371/journal.pone.0117895)

**Published:** January 30, 2015

**Copyright:** © 2015 The PLOS ONE Staff. This is an open access article distributed under the terms of the [Creative Commons Attribution License](https://creativecommons.org/licenses/by/4.0/), which permits unrestricted use, distribution, and reproduction in any medium, provided the original author and source are credited.
